# Supplementary material for: Comprehensive Characterization of the Genomic Landscape in Chinese Pulmonary Neuroendocrine Tumors Reveals Prognostic and Therapeutic Markers (CSWOG-1901)
Source: PubMed Central journal article supplement — Oncologist. 2022 Feb 4;27(2):e116–25. doi: 10.1093/oncolo/oyab044 (PMC8895731; doi:10.1093/oncolo/oyab044), 2022-02-04
Supplement: oyab044_suppl_supplementary_figures.pdf [file oyab044_suppl_supplementary_figures.pdf]

Supplemental Figures for:  
Comprehensive characterization of the genomic landscape in Chinese pulmonary neuroendocrine tumors reveals prognostic and therapeutic markers  
Lin Wu et al.

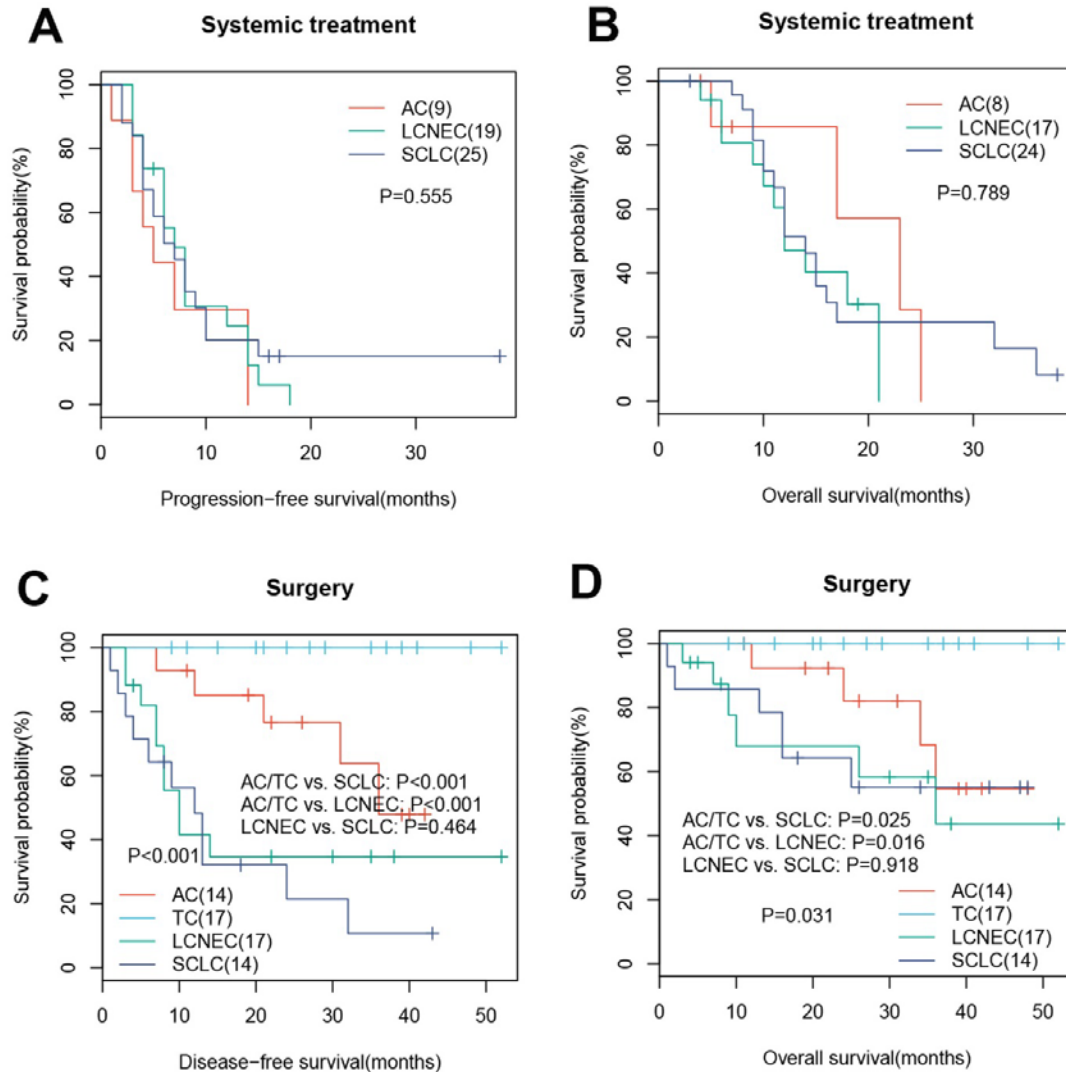

**Figure S1. The comparison of prognosis in different histological sub-cohorts.** A. Progression-free survival in patients treated with systemic treatment; B. Overall survival in patients with systemic treatment; C. Disease-free survival in patients treated with surgery; D. Overall survival in patients treated with surgery.

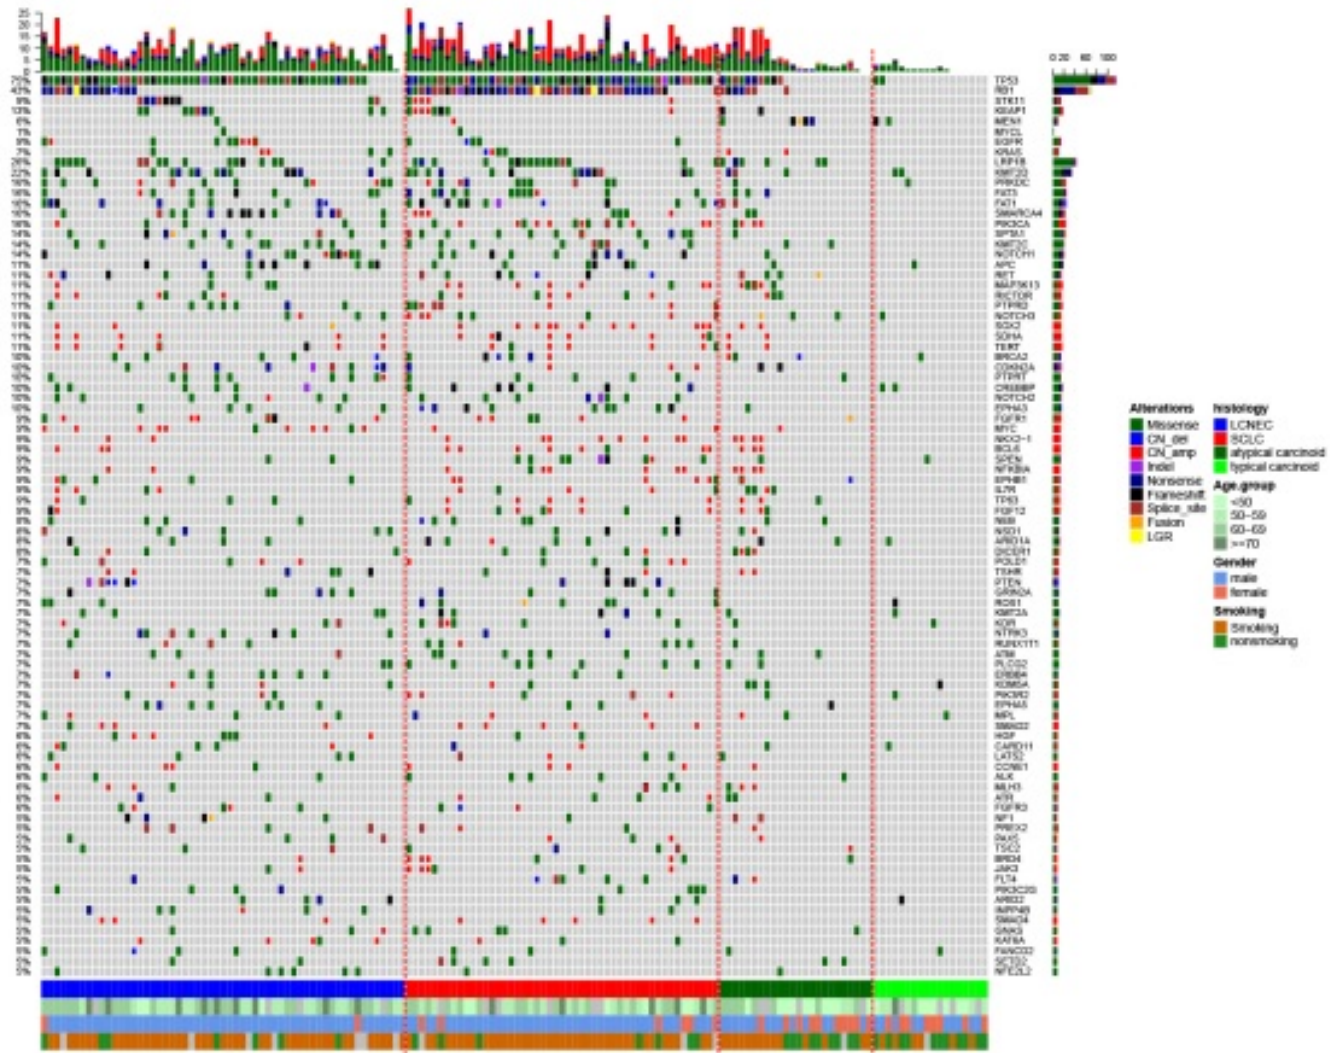

**Figure S2.** The oncoprint of genomic alterations identified in pulmonary neuroendocrine tumor ( $n=148$ ). Only genes with mutated number  $> 5$  were presented except for *MEN1*, *STK11*, *MYCL*, and *EGFR*.

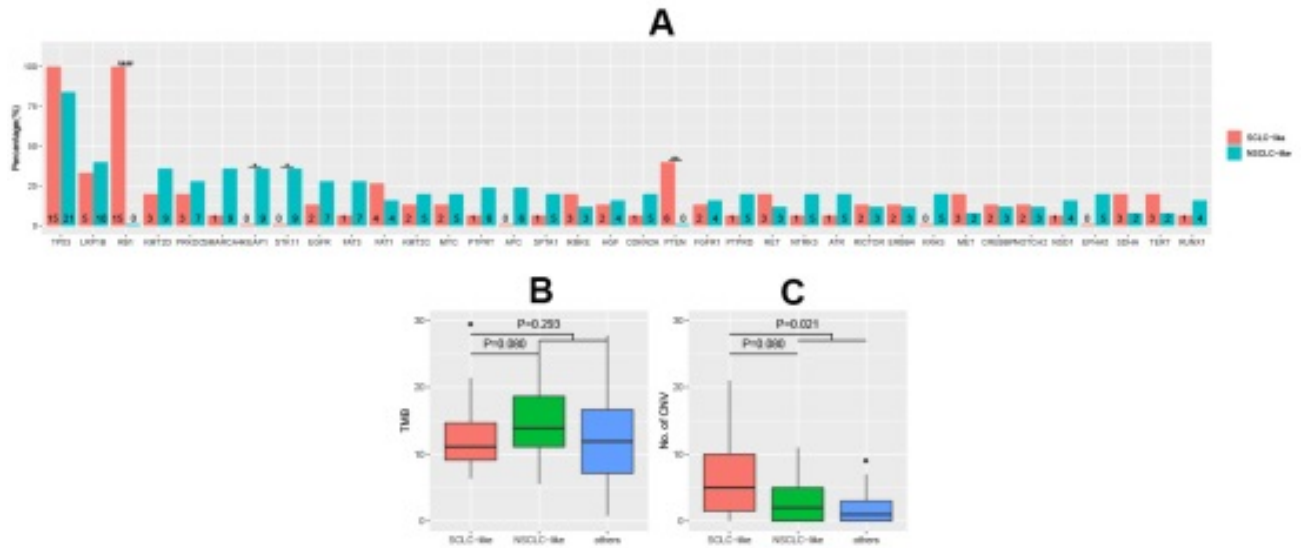

**Figure S3. The comparison of genomic features in different LCNEC subsets.** A. Gene mutated frequency; B. Tumor mutational burden (TMB); C. Copy number variation (CNV) (\* $P < 0.05$ , \*\* $P < 0.01$ , \*\*\* $P < 0.001$ , \*\*\*\* $P < 0.0001$ ). SCLC-like refers to LCNEC harboring concomitant *TP53/RB1* alterations; NSCLC-like refers to LCNEC harboring no *RB1* alteration but harboring alteration(s) in *STK11*, *ERBB2*, *MET*, *KRAS*, *KEAP1* or *EGFR*.

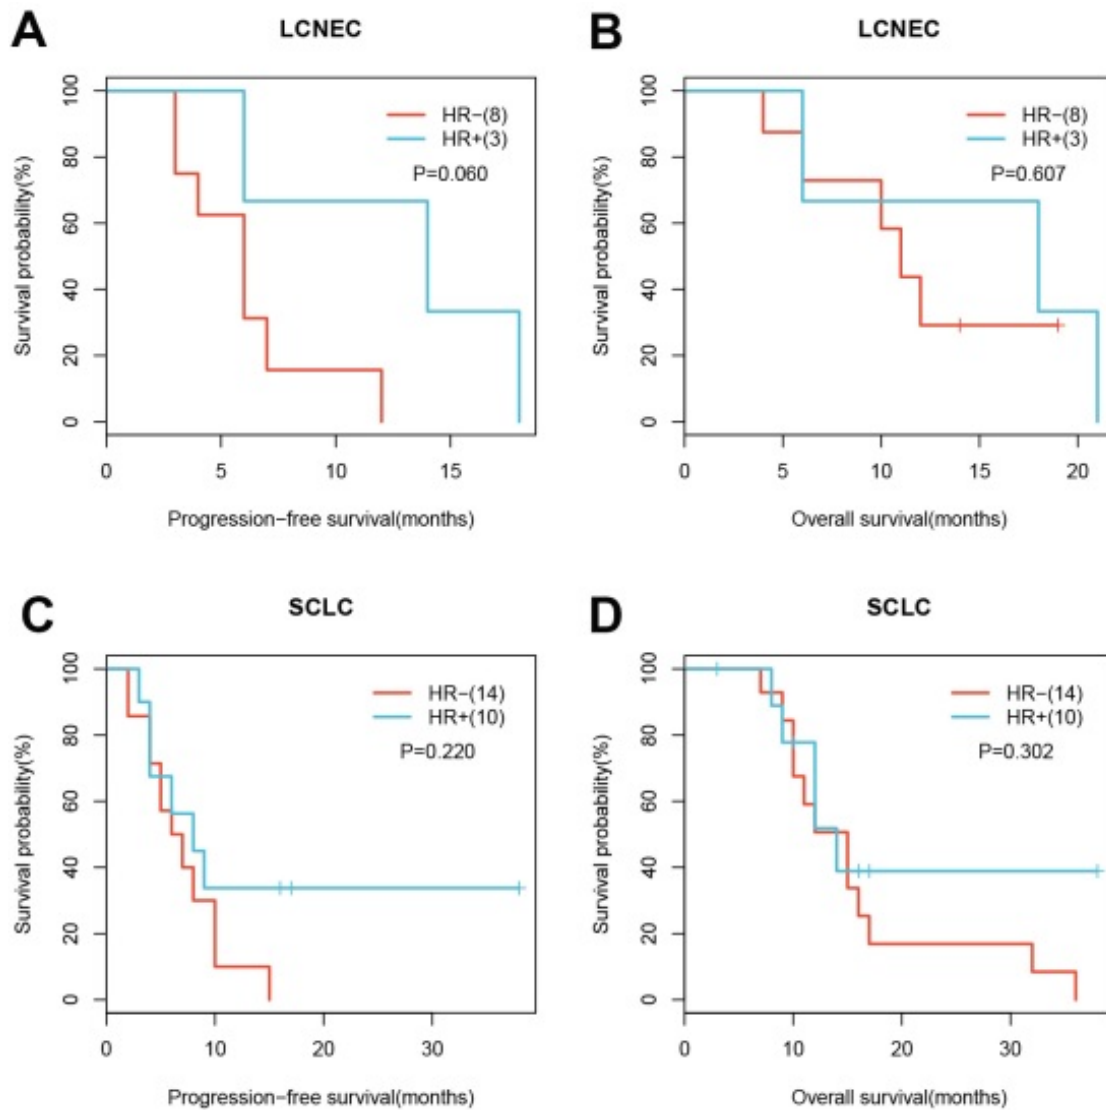

**Figure S4. The association of alteration in homologous recombination (HR) signaling pathway with prognosis in LCNEC and SCLC patients treated with platinum-based chemotherapy.**

**A**

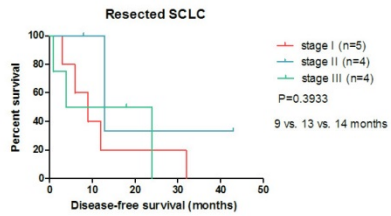

**B**

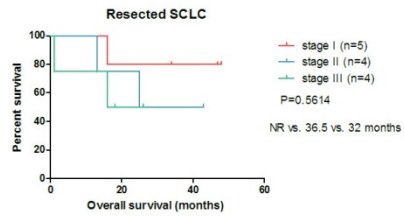

**Figure S5: The association of tumor stage with survival outcomes in resected SCLC patients. A.** Disease-free survival in resected SCLC patients; **B.** Overall survival in resected SCLC patients.

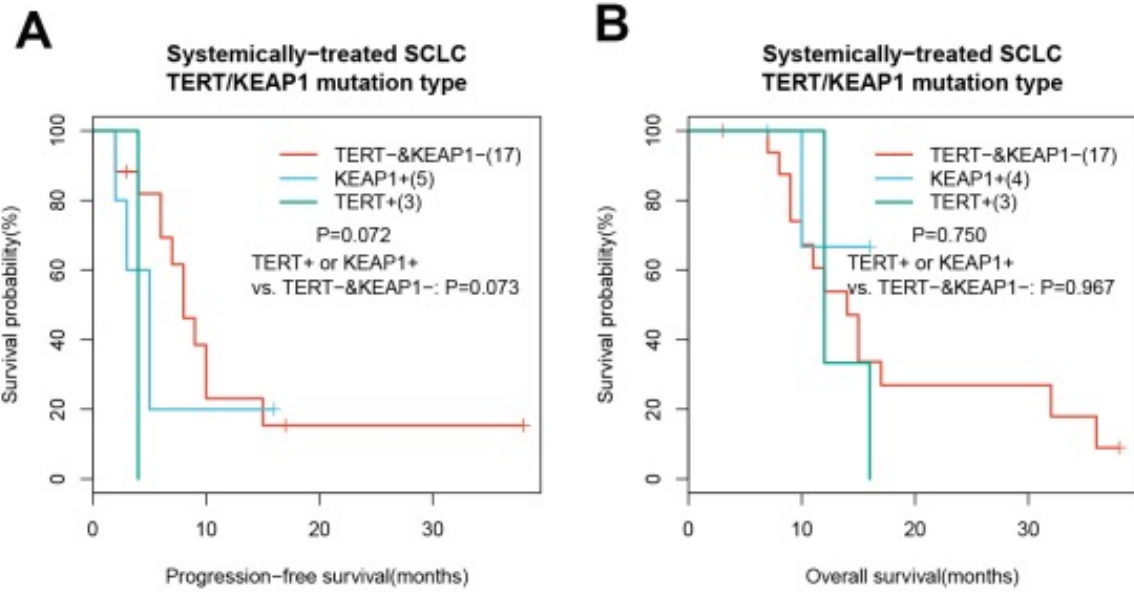

**Figure S6. The association of TERT/KEAP1 mutation with prognosis in SCLC patients with systemic treatment.**

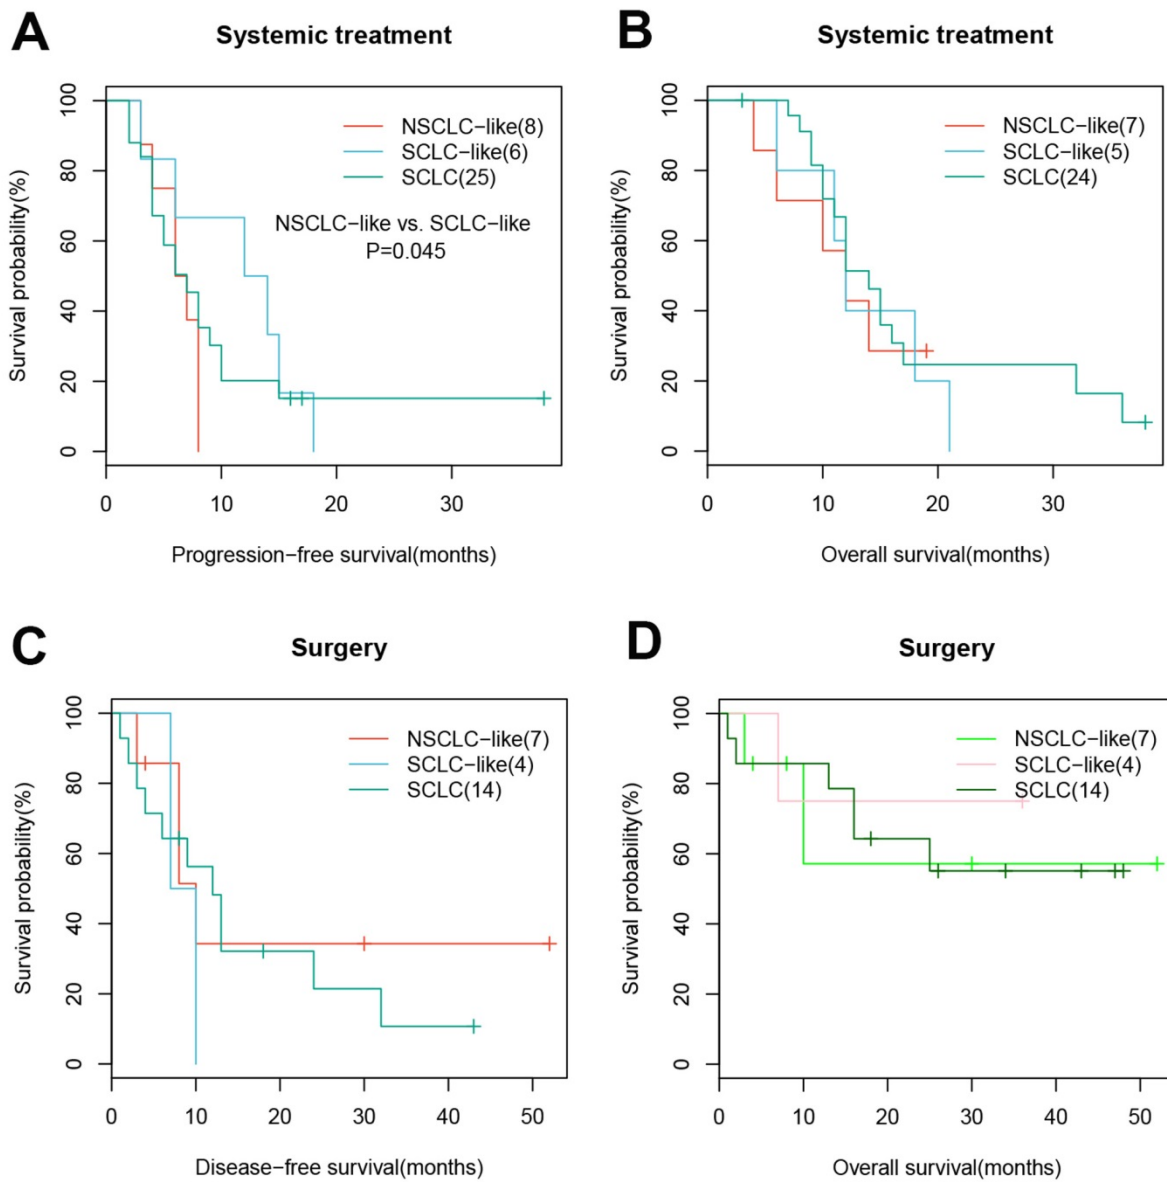

**Figure S7. The comparison of prognosis in different LCNEC subsets and SCLC. A. Progression-free**

survival in patients treated with systemic treatment; B. Overall survival in patients with systemic treatment; C. Disease-free survival in patients treated with surgery; D. Overall survival in patients treated with surgery.
